# Supplementary material
Source: PubMed Central journal article supplement (PMC5036976)

## **Figure Legend**

Figure 1 – Variation in Patient Selection (Presentation) for Elective Aortic Aneurysm Repair

Figure 2 – Preoperative Management for Elective Aortic Aneurysm Repair

Figure 3 – Proportion of Repairs Completed with EVAR

Figure 4 – Operative Approach for Elective Aortic Aneurysm Repair

Figure 5 – Operative Technique for Elective Open Aortic Aneurysm Repair

Figure 6 – Operative Technique for Ruptured Aortic Aneurysm Repair

Supplement Figure 1 – Variation in Patient Selection (Presentation) for Ruptured Aortic Aneurysm Repair

Supplement Figure 2 – Indications for Small Aneurysm Repair Among Elective Cases

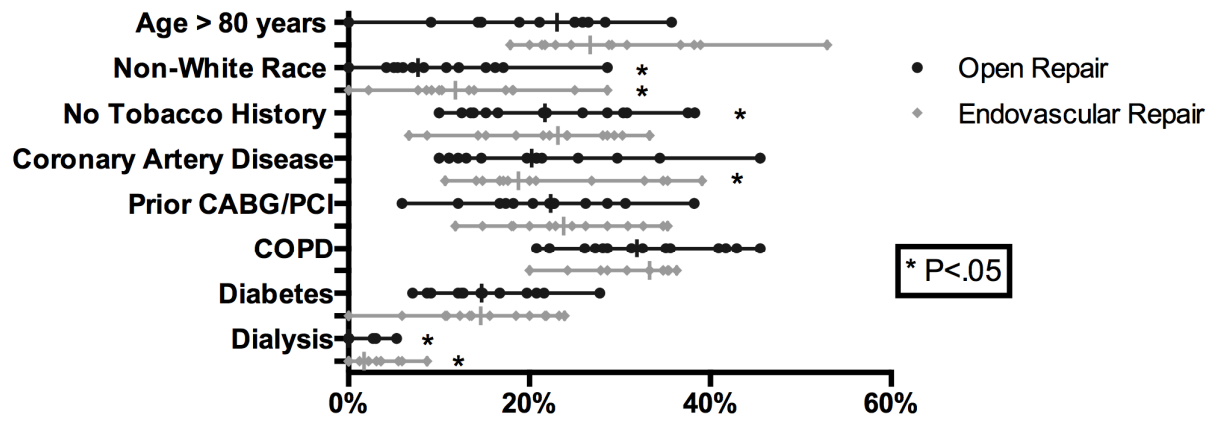

Each symbol denotes VQI region

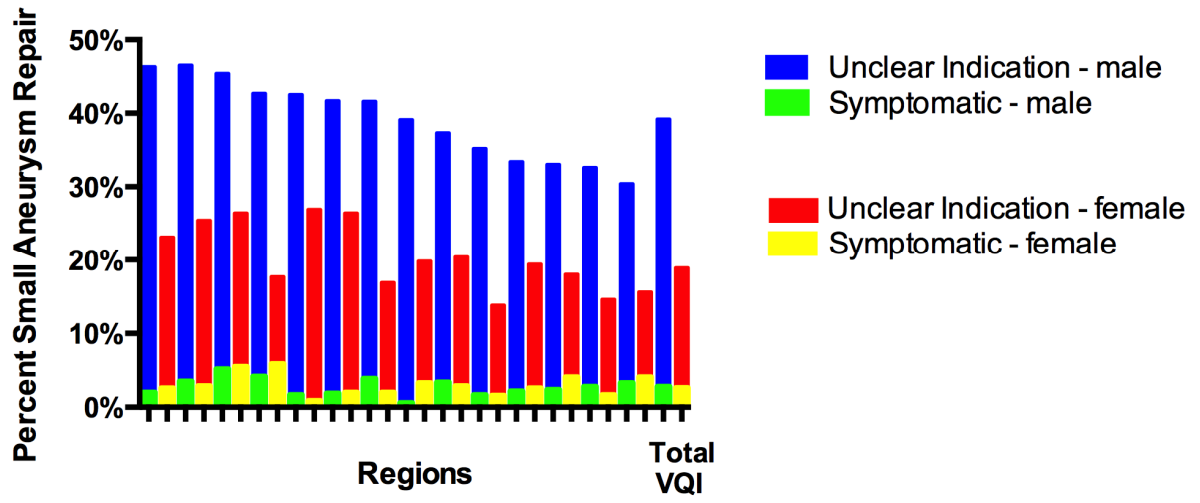

Supplement: NIHMS764524-supplement-supplement_1.pdf [file NIHMS764524-supplement-supplement_1.pdf]
